# Supplementary material for: Photodynamic activity attained through the ruptured π-conjugation of pyridyl groups with a porphyrin macrocycle: synthesis and the photophysical and photobiological evaluation of 5-mono-(4-nitrophenyl)-10,15,20-tris-[4-(phenoxymethyl)pyridine]-porphyrin and its Zn(ii) complex
Source: Royal Society of Chemistry journal article supplement (doi:10.1039/d0pp00319k), 2020-12-01
Supplement: d0pp00319k1.pdf [file d0pp00319k1.pdf]

## Supporting information

### **Photodynamic activity attained through the ruptured $\pi$ -conjugation of pyridyl groups with a porphyrin macrocycle: synthesis and the photophysical and photobiological evaluation of 5-mono-(4-nitrophenyl)-10,15,20-tris-[4-(phenoxyethyl)pyridine]-porphyrin and its Zn(II) complex**

**Zeaul H. Mazumder,<sup>1</sup> Debdulal Sharma,<sup>2</sup> Devashish Sengupta,<sup>\*1</sup> Avinaba Mukherjee,<sup>3</sup> Jayanta Sarmah Boruah,<sup>1</sup> Samita Basu,<sup>4</sup> Pradeep Kumar Shukla,<sup>5</sup> Tarun Jha.<sup>6</sup>**

Address: <sup>1</sup>Department of Chemistry, Assam University; Silchar, Assam, India – 788011

<sup>2</sup>Department of Chemistry, N. C. College, Badarpur, Karimganj, Assam, India-788806

<sup>3</sup>Department of Zoology, Charuchandra College, University of Calcutta, Kolkata, India-700029

<sup>4</sup>Chemical Science Division, Saha Institute of Nuclear Physics, Kolkata, India--700064.

<sup>5</sup>Department of Physics, Assam University; Silchar, Assam, India – 788011

<sup>6</sup>Department of Pharmaceutical Technology, Jadavpur University, Kolkata, India -700032

*Corresponding Author E-mail: Devashish Sengupta; [devashish.sengupta@uni.sydney.edu.au](mailto:devashish.sengupta@uni.sydney.edu.au)*

## **Table of Contents**

|                                              |    |
|----------------------------------------------|----|
| 1. $\Delta G_{\text{sol}}$ values.           | 1  |
| 2. $^1\text{H}$ -NMR Spectral Data.          | 2  |
| 3. Mass Spectral Data.                       | 6  |
| 4. Photostability data.                      | 8  |
| 5. Optimized geometries of target compounds. | 10 |
| 6. Singlet oxygen generation results         | 11 |

**Table S1:** The Gibbs free energies of the compounds and their free energy of solvation ( $\Delta G_{\text{sol}}$ ), as determined at the B3LYP/6-31G\* level of theory.

| Compounds                  | Gibbs free energy (a.u.) |               | $\Delta G_{\text{sol}}$ (kcal/mol) |
|----------------------------|--------------------------|---------------|------------------------------------|
|                            | Gas phase                | Aqueous media |                                    |
| (NPh)TPyP<br>(reference)   | −2165.847834             | −2165.869791  | −13.78                             |
| (NPh)TPyPZn<br>(reference) | −3943.90699              | −3943.937039  | −18.86                             |
| P <sub>3</sub> N           | −3202.268471             | −3202.301349  | −20.63                             |
| P <sub>3</sub> NZn         | −4980.327341             | −4980.368709  | −25.96                             |

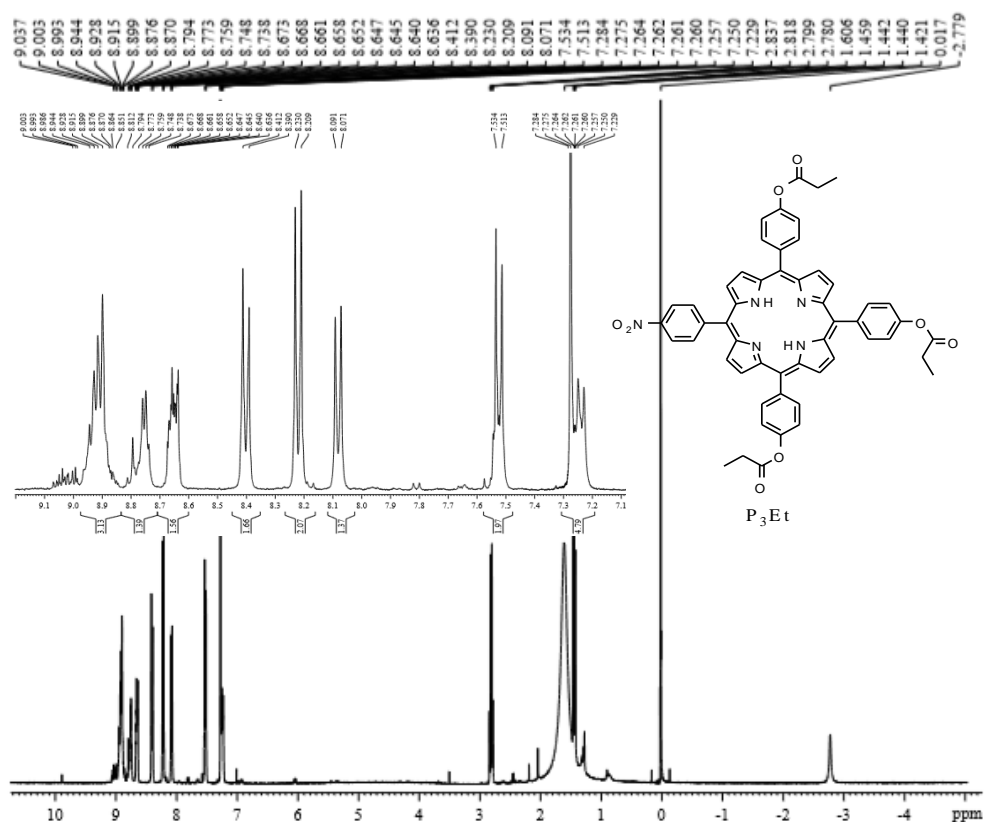

<sup>1</sup>H-NMR (400 MHz, CDCl<sub>3</sub> at 300 K),  $\delta$ : 8.64 (d, 2H;  $J$  = 8.12 Hz; 2,6-nitrophenyl), 8.08 (d, 2H;  $J$  = 8.01 Hz; 3,5-nitrophenyl), 8.92 (d, 2H;  $J$  = 5.12 Hz;  $\beta$ -pyrrole), 8.89 (s, 4H;  $\beta$ -pyrrole), 8.74 (d, 2H;  $J$  = 5.10 Hz;  $\beta$ -pyrrole), 8.22 (d, 4H;  $J$  = 8.23 Hz; 2,6-phenyl), 7.23 (d, 4H;  $J$  = 8.23 Hz; 3,5-phenyl), 8.40 (d, 2H;  $J$  = 8.60 Hz; 2,6-phenyl), 7.53 (d, 2H;  $J$  = 8.40 Hz; 3,5-phenyl), 1.44 (t, 9H;  $-\text{CH}_3$  ester), 2.80 (q, 6H;  $-\text{CH}_2$  ester),  $-2.77$  (s, 2H, NH pyrrole). Apart from that, there were distinct signals at  $\delta$  = 7.27 (s, due to traces of CHCl<sub>3</sub> in CDCl<sub>3</sub>) and at 1.60 (s, due to HOD). The peak appeared at  $\delta$  = 0.017 (s, due to TMS).

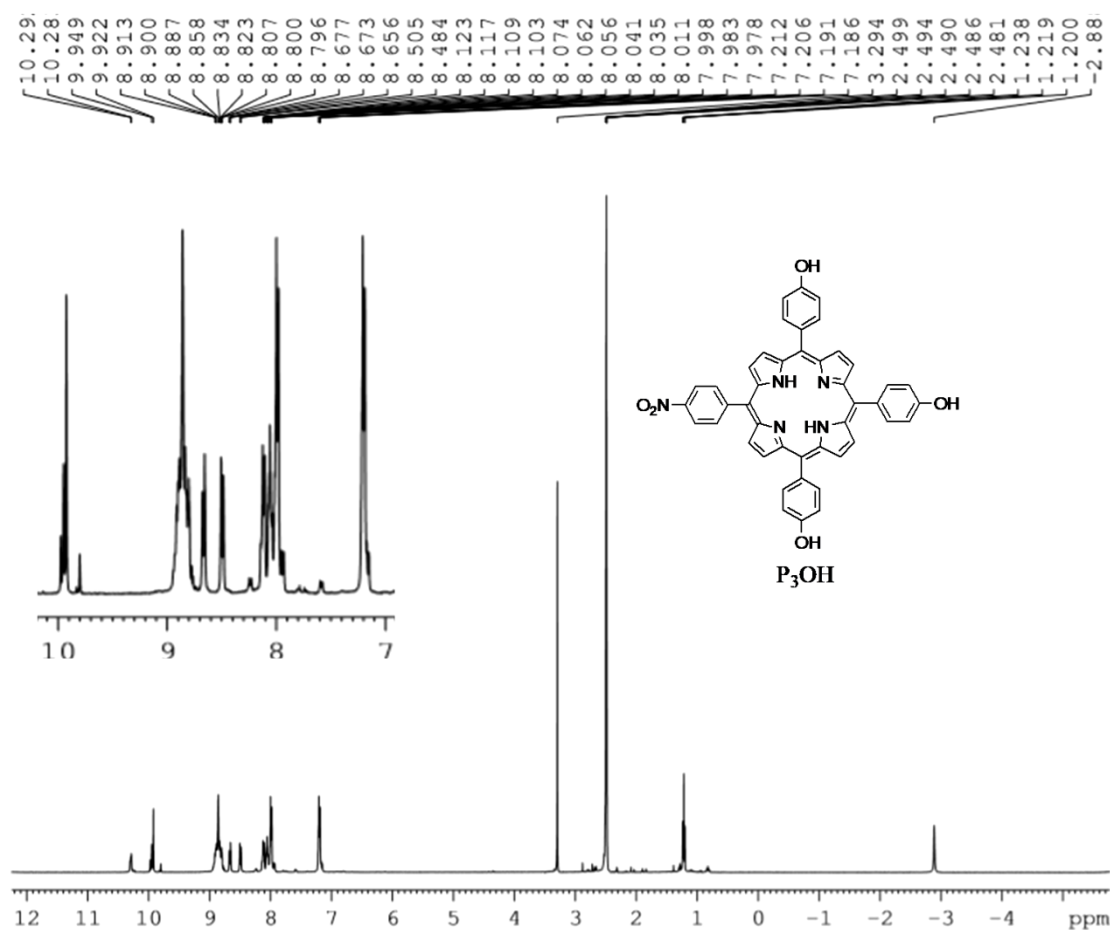

<sup>1</sup>H-NMR (400 MHz, DMSO-d<sub>6</sub> at 300 K),  $\delta$  = 10.30 (s, 3H; -OH), 9.92 (d, 2H; 2,6-nitrophenyl), 8.91 (d, 2H;  $\beta$ -pyrrole), 8.85 (s, 4H;  $\beta$ -pyrrole), 8.82 (d, 2H;  $\beta$ -pyrrole), 8.75 (d, 2H; 2,6-phenyl), 8.50 (d, 2H; 2,6-phenyl), 8.10 (d, 2H; 3,5-nitrophenyl), 7.99 (d, 4H; 2,6-phenyl), 7.21 (d, 2H; 3,5-phenyl),  $\delta$  -2.88 (s, 2H; NH pyrrole). Other distinct signals at  $\delta$  = 2.49 (s, due to traces of DMSO in DMSO-d<sub>6</sub>) and at 3.29 (br, due to HOD) were also observed.

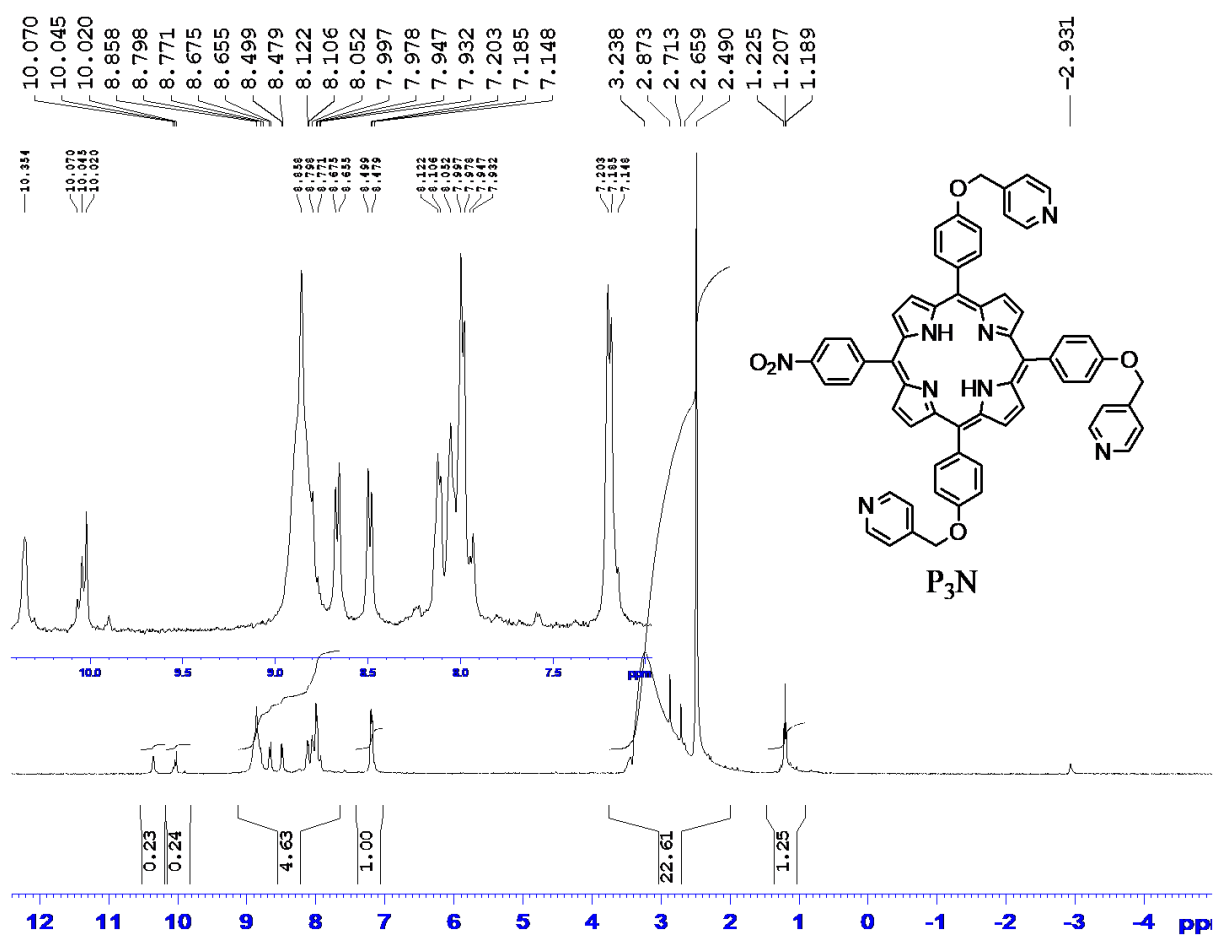

<sup>1</sup>H-NMR (400 MHz, DMSO-d<sub>6</sub> at 300 K), δ: 10.35 (d, 6H; 2,6-pyridine), 10.04 (d, 2H; *J* = 10.00 Hz; 2,6-nitrophenyl), 8.85 (s, 4H; β-pyrrole), 8.66 (d, 2H; *J* = 8.00 Hz; β-pyrrole), 8.48 (d, 2H; *J* = 8.00 Hz; β-pyrrole), 8.12 (d, 6H; 3,5-pyridine), 7.94 (d, 2H; 3,5-nitrophenyl), 7.99 (d, 6H; *J* = 7.60 Hz; 2,6-phenyl), 7.18 (d, 6H; *J* = 7.60 Hz; 3,5-phenyl). δ = -2.93 (s, 2H; NH pyrrole), 2.71 (s, 6H; -OCH<sub>2</sub>). Signals at δ = 2.49 (s, due to traces of DMSO in DMSO-d<sub>6</sub>), 3.33 (br, due to HOD), and ethanol at (1.20 t, -CH<sub>3</sub>, 3.52 overlapped, -CH<sub>2</sub>) were also observed.

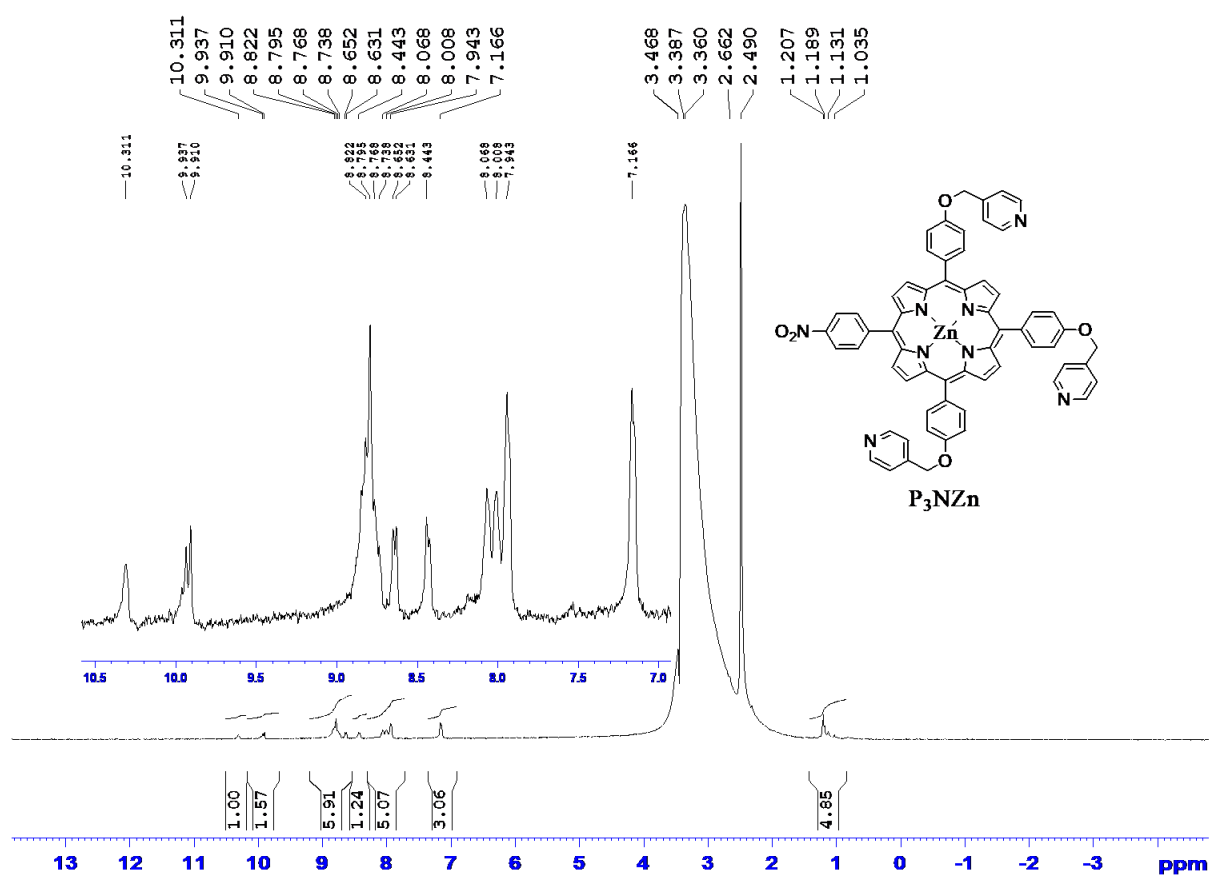

$^1\text{H}$ -NMR (400 MHz,  $\text{DMSO-d}_6$  at 300 K),  $\delta$ : 10.31 (d, 6H; 2,6-pyridine), 9.92 (d, 2H;  $J = 10.80$  Hz; 2,6-nitrophenyl), 8.76 (s, 4H;  $\beta$ -pyrrole), 8.64 (d, 2H;  $J = 8.40$  Hz;  $\beta$ -pyrrole), 8.44 (d, 2H;  $J = 8.40$  Hz;  $\beta$ -pyrrole), 8.06 (d, 6H; 3,5-pyridine), 8.00 (d, 2H; 3,5-nitrophenyl), 7.94 (d, 6H;  $J = 7.60$  Hz; 2,6-phenyl), 7.16 (d, 6H;  $J = 7.60$  Hz; 3,5-phenyl), 2.66 (s, 6H;  $-\text{OCH}_2$ ). Residual signals at  $\delta = 2.49$  (s, due to traces of DMSO in  $\text{DMSO-d}_6$ ) and at 3.46 (br, due to HOD), ethanol (1.18 t,  $-\text{CH}_3$ , 3.66 m,  $-\text{CH}_2$ ).

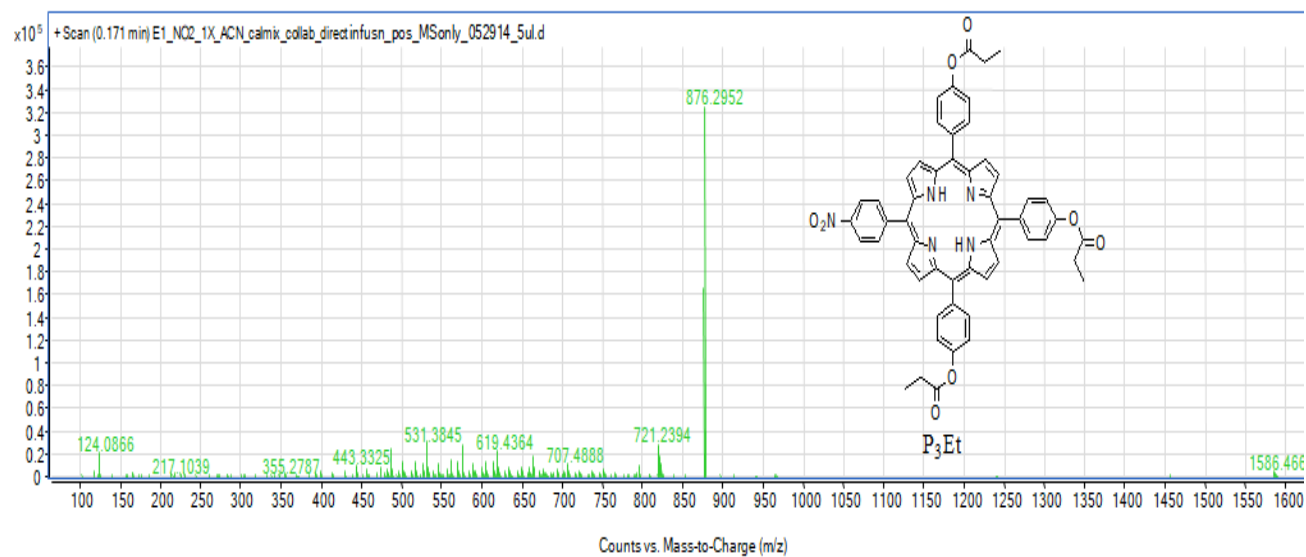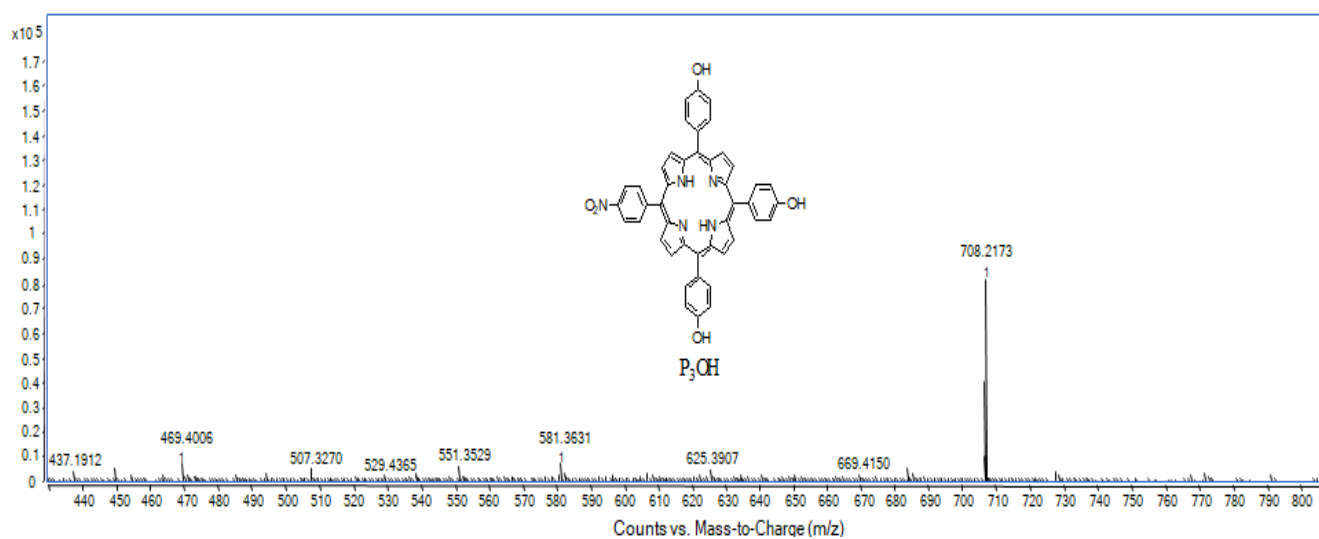

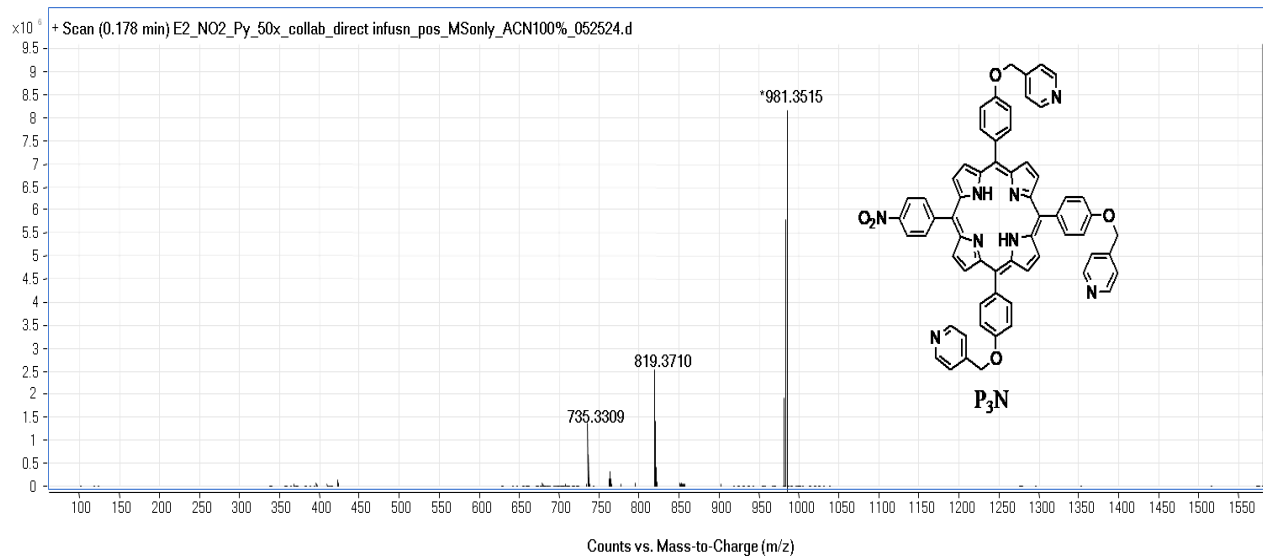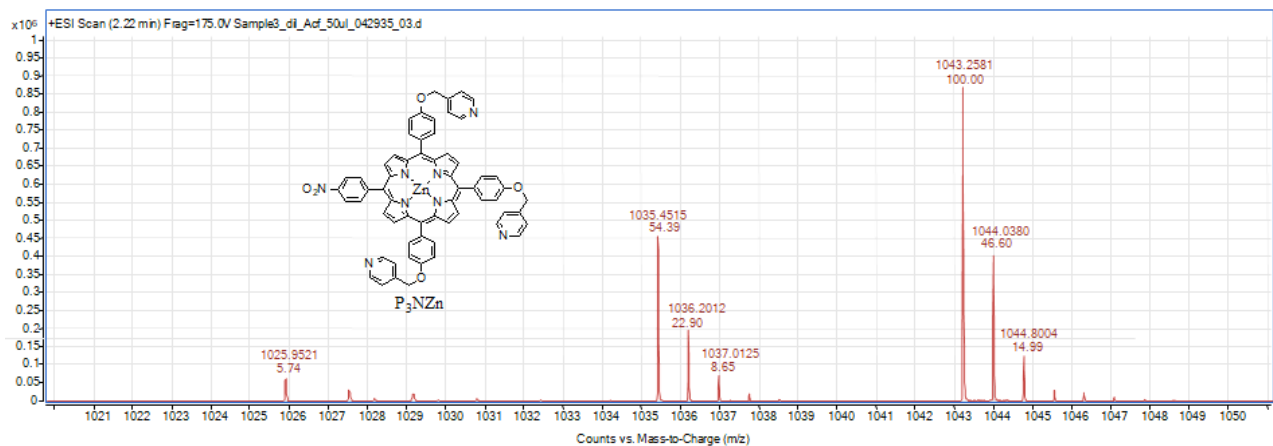

**Fig. S1:** Overlaid absorption spectra of the target photosensitizers  $P_3N$  and  $P_3NZn$  recorded in water (at 10  $\mu M$  concentration) at 90 days interval.

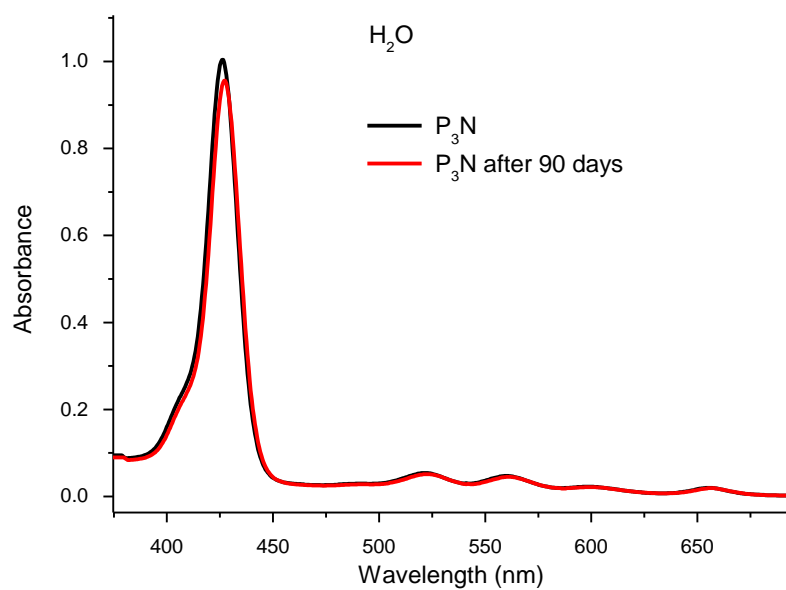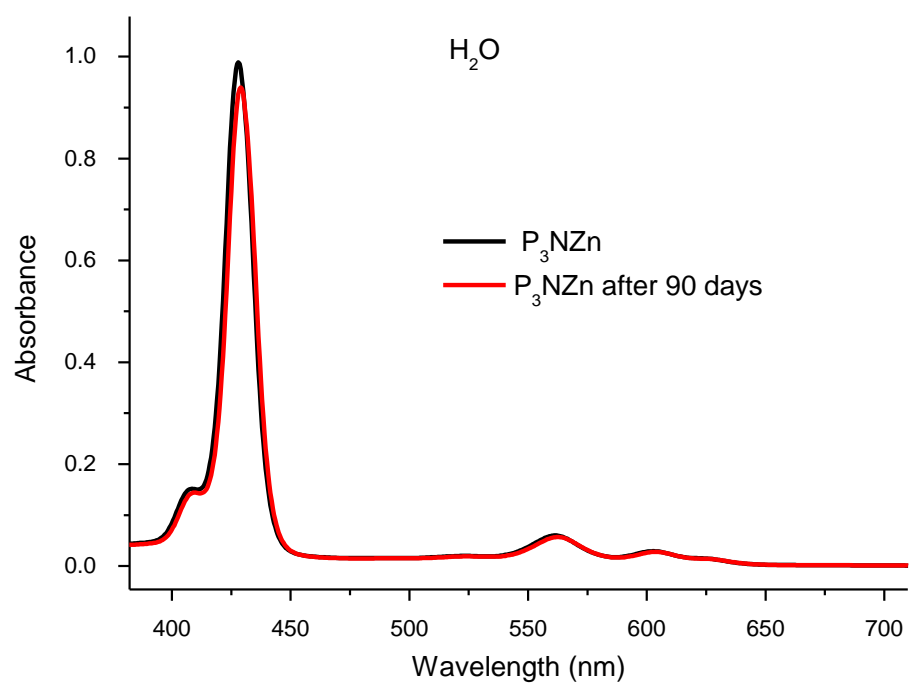

**Fig. S2:** Overlaid absorption spectra of the target photosensitizers  $P_3N$  and  $P_3NZn$  recorded in DMSO (at 10  $\mu M$  concentration) at 90 days interval.

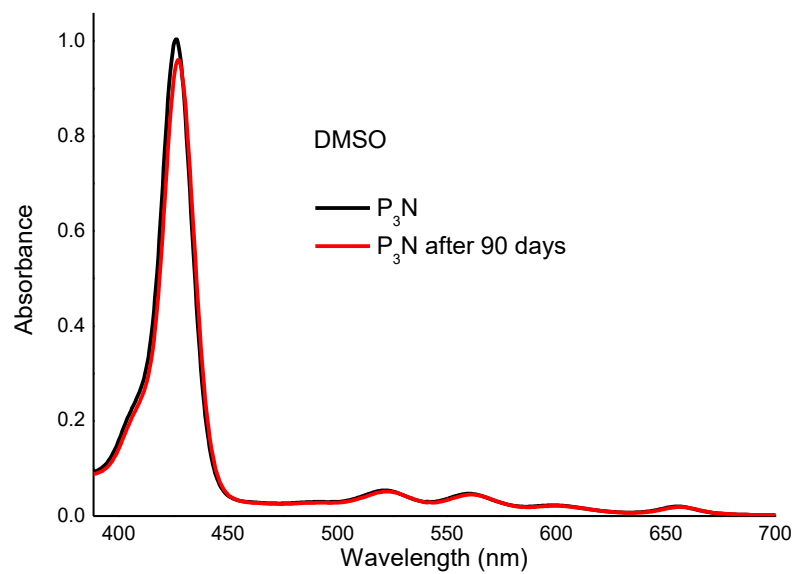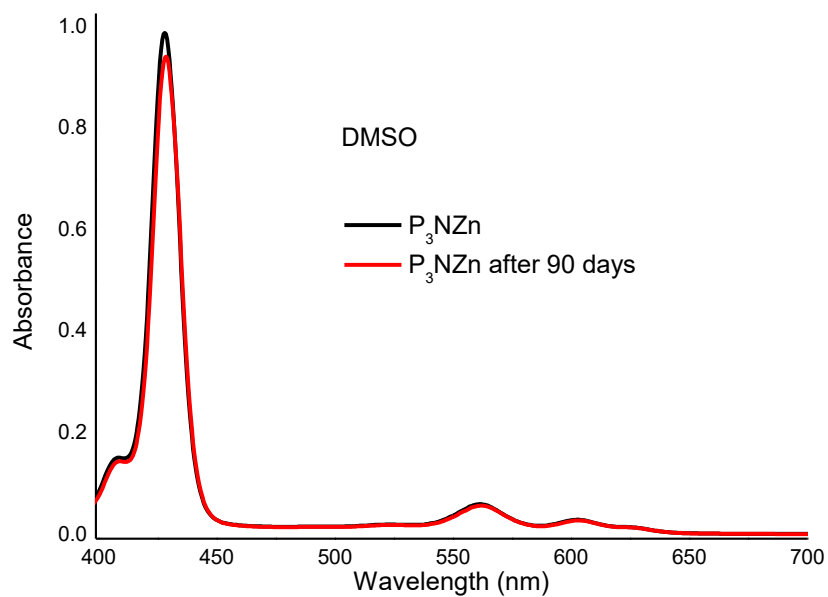

**Fig. S3:** Optimized geometries of the reference porphyrins free base (NPh)TPyP, and its corresponding zinc(II)-complex (NPh)TPyPZn, along with the target photosensitizers with distal pyridyl groups, P<sub>3</sub>N and P<sub>3</sub>NZn at the B3LYP/6-31G\* level of theory in aqueous media.

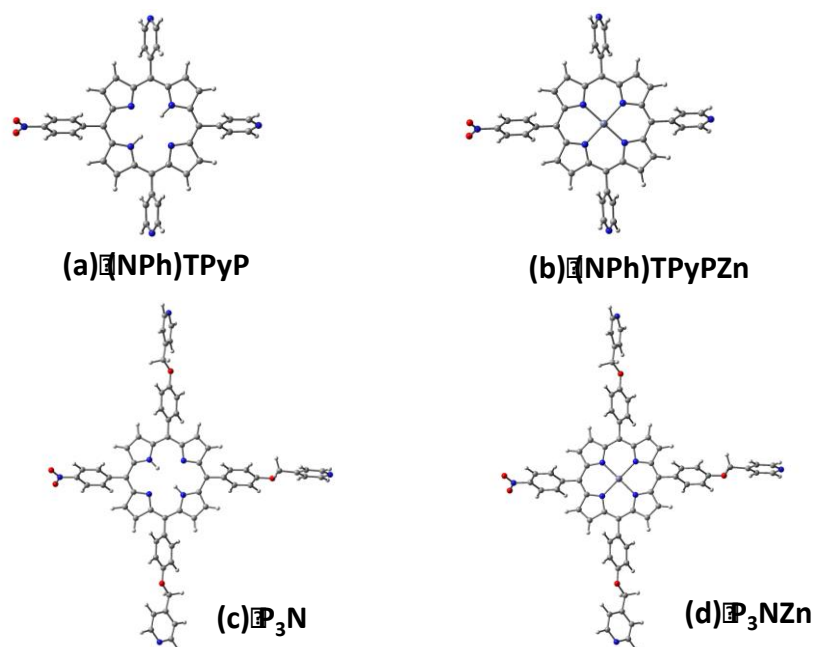

**Fig. S4:** Plot of kinetics of photooxidation of DMA by the target PSs **P<sub>3</sub>N** and **P<sub>3</sub>NZn** in DMSO.

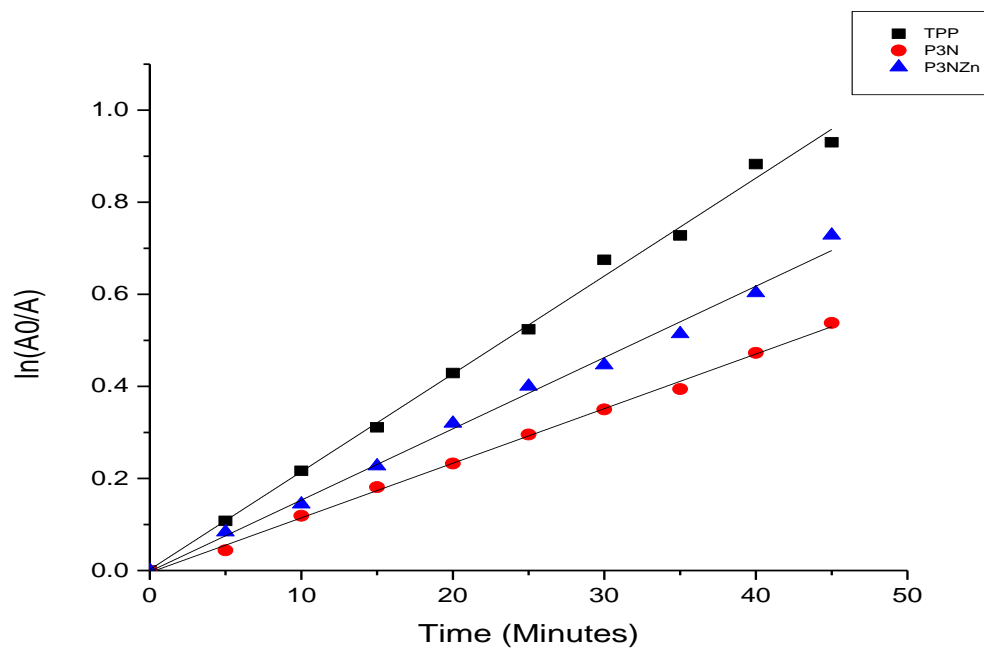

**Table S2:** Rate constant (k) for photooxidation of DMA in DMSO by target PSs and respective singlet oxygen quantum yield ( $\Phi_{\Delta}$ ).

| Compound                | Rate constant (k)<br>min <sup>-1</sup> | Singlet oxygen<br>quantum yield ( $\Phi_{\Delta}$ ) |
|-------------------------|----------------------------------------|-----------------------------------------------------|
| <b>P<sub>3</sub>NZn</b> | 0.01546                                | 0.73                                                |
| <b>P<sub>3</sub>N</b>   | 0.01186                                | 0.66                                                |
